# Supplementary material
Source: Copernicus journal article supplement (doi:10.5194/egusphere-2026-1010)
Supplement: Supplementary file [file egusphere-2026-1010-RC1-supplement.pdf]

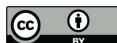

1 **Title:**

2 Detection of agricultural flash droughts using impact-informed thresholds

3

4 **Ingrid Ubeda-Trujillo**<sup>1, 2, 3</sup>, Micha Werner<sup>1</sup>, Claudia Bertini<sup>1</sup>, Miriam Coenders-Gerrits<sup>2</sup>, and  
5 Graham Jewitt<sup>1, 2</sup>

6 <sup>1</sup>IHE Delft Institute for Water Education, P.O. Box 3015, 2601 DA Delft, the Netherlands

7 <sup>2</sup>Delft University of Technology, Department Water Management. Section, P.O. Box 5048, 2600  
8 GA Delft, the Netherlands

9 <sup>3</sup>Universidad Nacional Autónoma de Nicaragua, UNAN-Managua. Rigoberto López Pérez  
10 roundabout, 150m east.

11 Correspondence to: [i.ubedatrujillo@tudelft.nl](mailto:i.ubedatrujillo@tudelft.nl)

12 **Abstract**

13

14 A rapid and sustained evaporative stress causes soils to lose moisture within days to weeks during  
15 sensitive crop phases. This rapid soil depletion can severely affect agricultural systems and  
16 manifest as events commonly referred to as agricultural flash droughts (AFDs). AFDs are often  
17 detected using literature-based thresholds that assume uniformity across time and space. This  
18 may, however, poorly represent the occurrence and impacts of AFDs in local contexts and limit  
19 usefulness to decision-makers who require context-specific information. This study aims to  
20 overcome these limitations by introducing an impact-informed calibration of the Standardized  
21 Evaporative Stress Ratio (SESR) by linking SESR thresholds to observed crop losses.  
22 Thresholds are derived temporally across crop management periods and spatially across soil  
23 textures. The proposed calibration approach is tested in Nicaragua's Dry Corridor of Central  
24 America, where rainfed agriculture predominates. Results suggest that although SESR exhibits  
25 coherent evaporative stress signals during years with drought-induced crop losses, literature-  
26 based thresholds showed limited skill in translating these signals into agriculturally relevant flash  
27 drought detection across different crop management periods and soil textures. Threshold  
28 performance varies across crop management periods and soil textures. Reliable thresholds could  
29 not be detected in sandy soils, whereas clay-rich soils exhibited stable and skilful thresholds. In  
30 loamy-silty soils, skilful thresholds were mainly observed during March and the pre-sowing  
31 period, with limited skill thereafter. Validation results also showed that calibrated thresholds,  
32 within the crop periods-soil combinations identified as skilful, successfully detected flash  
33 drought events associated with crop losses more frequently than those reported in the literature.  
34 Together, these findings indicate that monitoring AFD using impact-informed thresholds has an  
35 operational value for drought management and can support better decision-making.

36

37 **Keywords:** Evaporative stress; Impact-informed thresholds; Crop management periods; Soil  
38 Textures, Dry Corridor; Drought monitoring

39 **1. Introduction**

40

41 Drought is one of the major climate-related hazards affecting crop yields, particularly in  
42 dryland regions dominated by rainfed systems (Kibler et al., 2023; Verbist et al., 2018). This  
43 hazard thus undermines progress towards Sustainable Development Goals 1, 6 and 13.  
44 Drought arises when a prolonged lack of precipitation leads to low water availability in the  
45 soil, rivers, and reservoirs (Svoboda et al., 2002; Yuan et al., 2019). When these conditions  
46 are further intensified by high temperatures and evaporative stress that increase rapidly and  
47 persist over days to weeks, flash drought can develop (Basara et al., 2019; Noguera et al.,  
48 2022). Under these conditions, soils lose water faster than it is replenished, causing abrupt

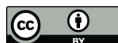

49 soil moisture decline and severely affecting agricultural systems (Yuan et al., 2019). When  
50 such rapid depletion affects the sensitive crop growth stages in rainfed systems (Verbist et  
51 al., 2018), the resulting conditions are commonly referred to as agricultural flash droughts  
52 (AFDs) (Lovino et al., 2024). These events often evolve over only a few weeks, leaving  
53 limited time for farmers and institutions to adjust planting decisions, resource allocation, or  
54 short-term water management (Yuan et al., 2023). Because of the rapid onset and severe  
55 impacts on rainfed agriculture, AFDs are a critical climate-related risk that needs to be  
56 explicitly considered in early warning systems, risk management, and drought monitoring in  
57 dryland regions.

58

59 A widely used approach for flash drought detection relies on the Standardized Evaporative Stress  
60 Ratio (SESR), derived from the ratio of actual and potential evaporation (Edris et al., 2023; Otkin  
61 et al., 2022). In most applications, flash droughts are detected based on SESR and literature-  
62 based fixed percentile thresholds, implicitly assuming that a given percentile represents a  
63 comparable level of stress across regions and seasons. Yet percentiles are purely relative  
64 measures of rarity rather than of absolute stress, so a fixed percentile does not necessarily imply  
65 the same level of plant and soil-water stress everywhere (Hobbins and Huntington, 2016; Otkin  
66 et al., 2022). This assumption fails particularly in drylands with rainfed systems, because high  
67 evaporative demand and chronically low soil moisture make evaporative stress part of the normal  
68 background (Hobbins and Huntington, 2016; Kibler et al., 2023). In such settings, a fixed SESR  
69 percentile threshold does not consistently distinguish anomalous evaporative stress from  
70 background conditions across soil textures, and may not correspond to the same SESR levels at  
71 which agricultural impacts occur (Suliman et al., 2024; Yu et al., 2023). These issues highlight  
72 a broader methodological limitation of current SESR-based flash drought detection frameworks  
73 when applied across diverse climate and soil conditions.

74 Moreover, thresholds used in the literature are usually defined independently of the crop  
75 calendar, even though short dry spells during sensitive growth stages can cause damage (Verbist  
76 et al., 2018), while a similar stress outside these windows has limited impact (Bucheli et al.,  
77 2021; Teleubay et al., 2025). This creates a gap between when SESR anomalies are detected and  
78 when impacts occur in the local context. Others indicator such as the Vegetation Health Index  
79 (VHI) provides more direct evidence of agricultural stress on the ground, but it is reactive,  
80 signalling stress only after it has occurred (Li et al., 2023; Rojas, 2020). In contrast, SESR  
81 responds earlier to anomalies in the surface energy and water balance (Anderson et al., 2016;  
82 Hobbins and Huntington, 2016), offering a timely physically based signal of evaporative stress  
83 that has the potential to support operational use (Buitink et al., 2021; Leason et al., 2020; Li et  
84 al., 2023; Teleubay et al., 2025) when appropriately calibrated (McEwen et al., 2021; Shyrokaya  
85 et al., 2024). This suggests that SESR could support improved detection and monitoring of  
86 agricultural relevant flash drought conditions if thresholds were calibrated to local agricultural  
87 conditions and impact evidence. However, there is still no widely applied approach to  
88 systematically calibrating SESR thresholds across both crop management periods and soil  
89 textures, particularly in dryland, rainfed systems, which limits the operational relevance of SESR  
90 for agricultural flash drought monitoring and management.

91 In many dryland regions, these limitations are particularly critical for smallholder rainfed  
92 systems, where flash droughts can quickly translate into crop failure, food insecurity, and income  
93 loss (Solh and van Ginkel, 2014) as has occurred in the Central American Dry Corridor of  
94 Nicaragua, where recurrent drought episodes have been associated with declining crop yields  
95 and heightened vulnerability among smallholder farmers. Strengthening agricultural flash

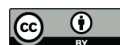

96 drought detection requires context-specific information that is essential for drought monitoring  
97 and management. This study addresses these limitations by calibrating SESR thresholds  
98 temporally across crop management periods and spatially across soil textures, using a benchmark  
99 of agricultural impacts. To do so, this physically based but standardised indicator was linked to  
100 locally observed drought-induced crop losses. The proposed approach aims to enhance the  
101 agricultural relevance of SESR-based flash drought detection for farmers and decision-makers  
102 in dryland, rainfed systems. Three main objectives were addressed: (i) to evaluate the potential  
103 agricultural relevance of the Standardized Evaporative Stress Ratio (SESR) for detecting  
104 anomalous evaporative stress during years with drought-induced crop losses, (ii) to calibrate and  
105 evaluate SESR thresholds across crop management periods and soil textures, and (iii) to validate  
106 literature-based and calibrated thresholds against locally independent agricultural benchmarks.  
107 In a wider context, the impact-based calibration approach which was tested in the Dry Corridor  
108 of Nicaragua offers a basis that could be adapted and tested in other dryland and rainfed regions  
109 and can support the integration of local informed and impact-based agricultural flash drought  
110 monitoring into drought management.

## 111 2. Data and methods

### 112 2.1 Overview of the study area: climate, agricultural, and edaphic context

113  
114 To develop and test the calibration process, this study focuses on the Nicaragua Dry Corridor,  
115 specifically in the northern portion of the Rio San Juan basin. This basin comprises eight  
116 hydrological catchments and includes major rivers such as the Sinecapa and Pacora (INETER et  
117 al., 2014). The basin spans diverse landscapes: The northern part overlaps with protected areas  
118 including Yalí, Mirafior-Moropotente and Tizey-Estanzuela. The middle part includes Lake  
119 Managua, several crater lagoons and additional protected areas, while the southernmost part  
120 comprises the Tisma wetland, a Ramsar site. In total, the basin encompasses 31 municipalities  
121 and approximately 640 settlements. At a broader scale, the study area forms part of the Central  
122 America Dry Corridor, which includes the countries of Guatemala, El Salvador, Honduras, and  
123 Costa Rica, bounded by the Caribbean region to the east and the Pacific Ocean to the west.

124  
125 Figure 1a-b shows that rainfed agriculture covers approximately 40% of the study area  
126 (Teluguntla et al., 2023; Ubeda Trujillo and Rocha, 2020) with subsistence and commercial  
127 farming based on the main staples: beans and maize (van der Zee Arias et al., 2012). The main  
128 cropping cycle extends from May to August (Figure 1d), lasting about four months and including  
129 pre-sowing, sowing, growing (vegetative and flowering stages), and harvesting periods (Figure  
130 1e). This cropping cycle coincides with the rainy season (Figure 1c). The average annual  
131 precipitation is about 800 mm/year, and mean temperatures are above 25°C for the whole year  
132 (van der Zee Arias et al., 2012). A notable climatological feature is the Canícula, a 10–20-day  
133 mid-summer dry spell, commonly occurring from mid-July to August linked to the El Niño-  
134 Southern Oscillation (Rojas et al., 2020). The Canícula temporally interrupts the rainy season  
135 and tends to intensify during El Niño years (Verbist et al., 2018). Atmospheric evaporative  
136 demand varies across climatic seasons and regions within the study area. Based on MOD16A2,  
137 during the dry season, in the east-central and south-central parts of the Pacific plains (46-80  
138 m.a.s.l.), potential evaporation (PET) reaches 8.5–9.3 mm day<sup>-1</sup> when aggregated over 10-day  
139 periods. In contrast, in the north-eastern and western parts of the mountainous areas (682–1004  
140 m.a.s.l.), PET ranges from 7.5–8.3 mm day<sup>-1</sup> (Salinas Marcenaro et al., 2023), reflecting elevated  
141 atmospheric evaporative demand before the onset of rains. PET decreases in both regions during  
142 the rainy season, with values of 4.5–6.0 mm day<sup>-1</sup> in the Pacific plains and 3.5–4.5 mm day<sup>-1</sup> in  
143 the mountainous ranges (Salinas Marcenaro et al., 2023). Overall, the Pacific shows the highest



144 evaporative demand through the year, while the northern mountain region exhibits the lowest  
 145 PET, following a common annual pattern governed by the transition from the rainy to the dry  
 146 season. The study area is characterised by six soil textures (DGOT, 2024): (1) coarser sandy, (2)  
 147 moderately coarse sandy, (3) loamy and silty, (4) moderately fine clay-loam, (5) fine clayey, and  
 148 (6) very fine expansive clayey soils (see Figure S1).

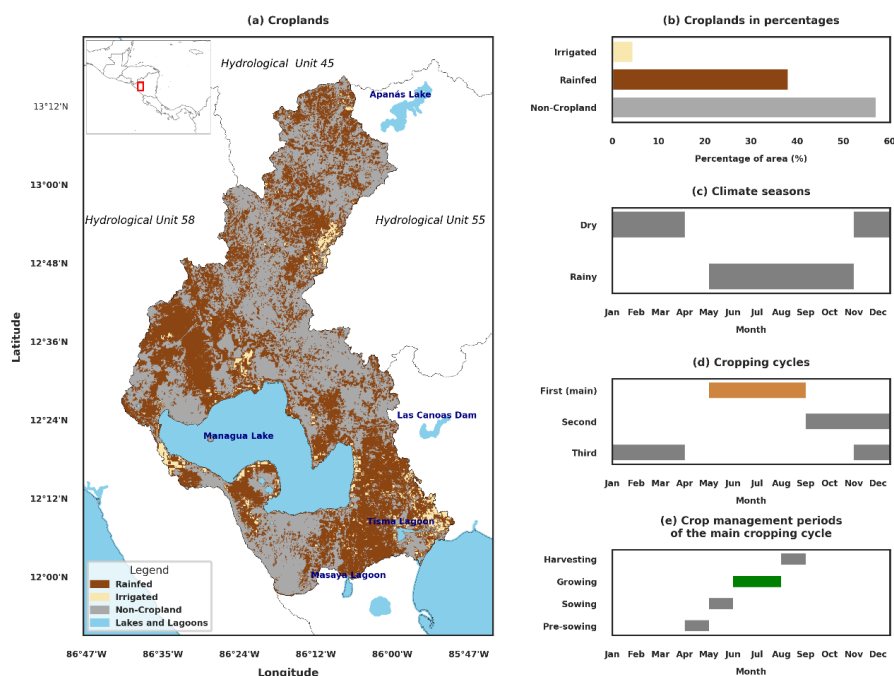

149  
 150 Figure 1. Overview of the northern part of the Rio San Juan basin. (a) croplands, (b) cropland in  
 151 percentage, (c) climate seasons, (d) cropping cycles, and (e) crop management periods of the  
 152 main cycle.

## 153 2.2 Data and preprocessing

154  
 155 Three main sources of data were used in this study: (1) MODIS MYD16A3GF (Steve et al.,  
 156 2021), (2) Vegetation Health Index (FAO, 2014), and (3) qualitative information such as  
 157 newspapers and reports. Qualitative information was compiled from the two oldest national  
 158 newspapers in Nicaragua and from reports produced by GIEWS (Global Information and Early  
 159 Warning System on Food and Agriculture; [https://www.fao.org/giews/reports/giews-](https://www.fao.org/giews/reports/giews-updates/en/)  
 160 [updates/en/](https://www.fao.org/giews/reports/giews-updates/en/)), FEWS NET (Famine Early Warning Systems Network; <https://fewsn.net/>), and EM-  
 161 DAT (The International Disaster Database; <https://www.emdat.be/>).

162  
 163 The MODIS dataset provides 8-day composites at 500 m spatial resolution from 2001 to 2024.  
 164 From this dataset, actual evaporation (ET) and potential evaporation (PET) inputs were used to  
 165 derive the Standardized Evaporative Stress Ratio (SESR) and the standardized changes in SESR  
 166 following the approach of Christian et al. (2019). Preprocessing included (i) computing the  
 167 Evaporative Stress Ratio as ET/PET; (ii) calculating long-term mean and standard deviation at  
 168 each time step and grid point; and (iii) standardizing ESR into Standardized Evaporative Stress  
 169 Ratio (SESR) using a z-score transformation:



170 
$$SESR_{ijp} = (ESR_{ijp} - \overline{ESR}_{ijp}) / \sigma ESR_{ijp} \quad (1)$$

171 Where  $SESR_{ijp}$  is the z-score of ESR at specific grid point ( $ij$ ) and time step  $p$ .  $ESR_{ijp}$  is the  
 172 evaporative stress ratio; and  $\sigma ESR_{ijp}$  is the corresponding standard deviation across all years.  
 173 (iv) computing temporal changes in SESR ( $\Delta SESR$ -z):

174 
$$(\Delta SESR_{ijp})_z = (\Delta SESR_{ijp} - \overline{\Delta SESR}_{ijp}) / \sigma \Delta SESR_{ijp} \quad (2)$$

176 Where  $\Delta SESR_{ijp}$  is the change of SESR at specific grid point ( $ij$ ) and time step  $p$ .  $\overline{\Delta SESR}_{ijp}$  and  
 177  $\sigma \Delta SESR_{ijp}$  are long-term mean and standardized deviation, respectively.

178  
 179 The Vegetation Health Index (VHI) dataset has a 1 km spatial resolution and is available from  
 180 1984 to 2024. Seven preprocessing steps are applied to ensure quality and temporal/spatial  
 181 compatibility with SESR. This includes: (i) a range filtering that removes values outside the valid  
 182 domain 0-1 (Kogan, 1995), (ii) an empirical saturation adjustment that smooths persistent  
 183 maximum values (VHI =1) to reduce saturation artifacts (Gu et al., 2013), (iii) a conversion of  
 184 decadal labels to ISO 8601 dates to ensure standardized time representation for further  
 185 alignment; (iv) a resampling to 8-day intervals that aligns VHI to the temporal resolution of  
 186 MODIS-based SESR products, (v) a linear temporal interpolation to 8-day resolution to fill  
 187 temporal gaps and enable regular time-series analysis (Soltani et al., 2004), (vi) a spatial filling  
 188 of voids through nearest-neighbour interpolation within valid data areas (Teoh et al., 2008), and  
 189 (vii) a comparison of the original data with the final 8-day resampled version at various spatial  
 190 points to evaluate the reliability of the harmonization process from the temporally interpolated  
 191 dataset.

### 192 2.3 Spatial and temporal calibration approach

193 The spatial and temporal calibration of SESR approach proposed here is summarized in six parts.  
 194 The spatial and temporal sampling design is presented in Sect. 2.3.1. The baseline benchmarks  
 195 of drought-induced crop losses are described in Sect. 2.3.2. The detection of agricultural flash  
 196 droughts is detailed in Section 2.3.3. In Sect. 2.3.4, a diagnostic assessment of the Standardized  
 197 Evaporative Stress Ratio (SESR) is conducted prior to calibration. The calibration of SESR  
 198 thresholds, including performance metrics and uncertainty analysis, is introduced in Sect. 2.3.5.  
 199 Finally, the validation strategy for literature-based and calibrated SESR thresholds is presented  
 200 in Sect 2.3.6.

#### 201 2.3.1 Spatial and temporal sampling design

202 The period of analysis was from February to August from 2000-2024. February to April is  
 203 considered an early warning opportunity period, since early evaporative stress signals during  
 204 these months may condition soil moisture availability before the sowing period. April is a critical  
 205 pre-sowing month, as high evaporative stress during this month can reduce germination success  
 206 ahead of sowing. Farmers typically prepare the land and make sowing decisions (Verbist et al.,  
 207 2018). Sowing typically occurs in May, with the main growing stages of maize and beans in  
 208 June-July, while August is the end of the main cropping cycle. To represent the spatial dimension  
 209 sample locations are distributed across six soil texture classes in rainfed areas (see Figure S1),  
 210 allocated proportionally to ensure a representative sample in each soil texture class, resulting in  
 211 a sampling interval of about 3 km and 388 time series of 8-day SESR values.

212



213 2.3.2 Impact benchmarks of drought-induced crop losses

214 Two agricultural-impact benchmarks related to drought-induced crop losses were created: one  
215 based on Vegetation Health Index (VHI) and a second derived from newspapers and reports  
216 (Figure 2). The VHI-based benchmark was used to identify impact-relevant years for calibration,  
217 whereas both benchmarks were used to validate literature-based and calibrated SESR thresholds.  
218 The benchmarks were obtained as follows:

- 219 (i) Years with drought-induced crop losses were obtained from the Vegetation Health  
220 Index (FAO, 2014). Crop losses were detected when VHI values at the end (in  
221 August) of the first cropping cycle fell below 0.35 (Fuganti et al., 2020). This  
222 criterion was applied independently at each sample location, each represented by  
223 independent time series. The resulting time series were then grouped by soil texture  
224 classes. Note that Figure 2 indicates the occurrence of crop loss impacts at one  
225 sample location and does not necessarily imply region-wide impacts.
- 226 (ii) Years with drought-induced crop loss reports were obtained from the two main  
227 national newspapers, as well as from the GIEWS, FEWS NET, and EM-DAT  
228 databases. Digital archives were systematically searched using drought- and impact-  
229 related keywords in Spanish and English, including "drought", "sequía", "lack of  
230 rain", "falta de lluvia", "lluvias tardan en llegar", "crop loss (es)", "pérdida de  
231 cosecha", "yield reduction", and combinations of these terms. For each candidate  
232 newspaper article or report, the information was organized into three levels of detail,  
233 each presented separately. The first level includes the date and a short description of  
234 the reported impacts for each source. The second level provides the dates, the type of  
235 impacts reported (e.g. economic, agricultural, population affected), and the sources.  
236 The third level summarizes the year, the crop impacts, and the sources reporting those  
237 impacts. Documented drought-induced crop loss events were retained only when  
238 reported by at least three independent sources. With respect to timing, newspapers  
239 usually report drought-related impacts from July onwards in the same year as the  
240 drought event occurs, which is the middle of the main cropping cycle under study.  
241 However, some international reports are reported in the year after the drought event.  
242 To harmonise the timing of reported impacts, each reported event was constrained to  
243 a one-month window centred on September. Crop losses reported between January  
244 and April were interpreted as impacts of drought events that occurred in the previous  
245 year. From a spatial perspective, crop loss impacts were inconsistently documented  
246 and spatially heterogeneous across municipalities and, consequently, across soil  
247 texture classes within the study area. Therefore, the drought-induced crop loss was  
248 interpreted as representative of broader regional conditions rather than as spatially  
249 explicit observations at the soil texture scale.

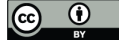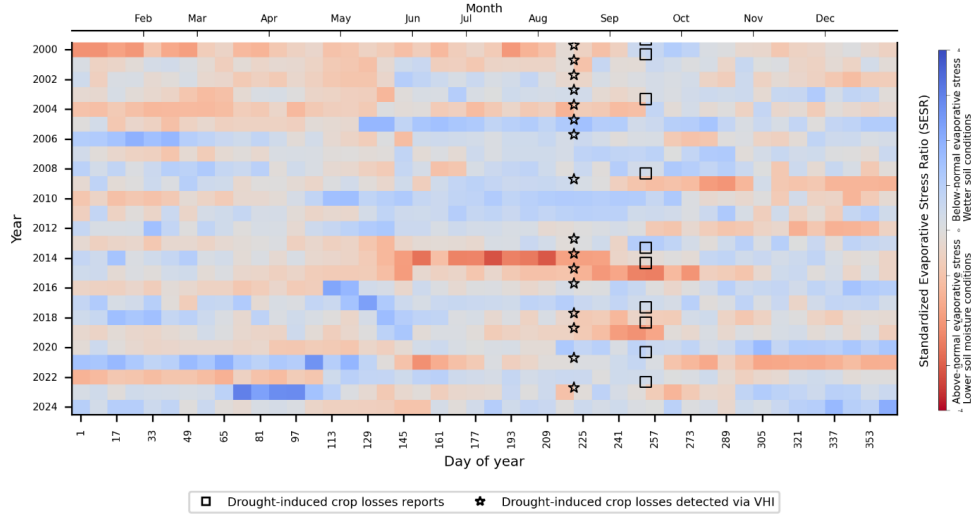

250

251 Figure 2 Years with crop losses derived from the Vegetation Health Index and reports at one  
 252 representative sample location within the study area characterise by moderately fine clay-loam  
 253 soil. The heatmap represents the median of the Standardized Evaporative Stress Ratio (SESR)  
 254 across the sampled locations and aggregated at each 8-day interval.  
 255

### 256 2.3.3 Detection of agricultural flash droughts

257 In the Standardized Evaporative Stress Ratio (SESR) framework described by Christian et al.,  
 258 (2019), a flash drought event is identified using percentile thresholds applied to SESR and the  
 259 rate of change of SESR ( $\Delta$ SESR), together with a minimum duration requirement. Drought is  
 260 classified when SESR falls below the 20<sup>th</sup> percentile of the distribution of SESR values, and the  
 261 event becomes a flash drought when rapid and sustained intensification of evaporative stress  
 262 persists for about 30 days. The rapid intensification is detected when  $\Delta$ SESR crosses the 40<sup>th</sup>  
 263 percentile of the distribution of  $\Delta$ SESR values and when the average  $\Delta$ SESR during the entire  
 264 event remains below the 25<sup>th</sup> percentile. These thresholds have been equally applied in other  
 265 studies (cf. Gou et al., 2022; Nguyen and Choi, 2024). This study refines this framework by  
 266 replacing the fixed 20<sup>th</sup> percentile threshold with a calibrated threshold specific to crop  
 267 management periods and soil texture.  
 268

269 When drought conditions are sustained, they signal an increase in evaporative stress, which in  
 270 turn raises the likelihood of soil moisture decline and associated agricultural impacts. Based on  
 271 this rationale, agricultural flash droughts (AFDs) in this study were detected when SESR dropped  
 272 below a defined threshold ( $\theta_{t,s}^*$ ), accompanied by an intense and sustained evaporative stress  
 273 confirmed using the 40<sup>th</sup> and 25<sup>th</sup> percentile thresholds of the  $\Delta$ SESR (Christian et al., 2019).  
 274 Accordingly, an AFD was defined as:  
 275

$$276 AFD_{t,k} = \begin{cases} 1, & \text{if } SESR_{t,s} \leq \theta_{t,k} \wedge \Delta SESR_{t,k} \leq P_{40} \text{ (1 exception allowed)} \wedge \overline{\Delta SESR}_{AFD,p} \leq P_{25} \\ 0, & \text{Otherwise} \end{cases} \quad (3)$$

277 Where  $AFD_{t,k}$  denotes the presence (1) or absence (0) of an agricultural flash drought.  $SESR_{t,k}$   
 278 is the Standardized Evaporative Stress Ratio across crop management period  $t$  and sample  $k$   
 279 falling in soil texture.  $\theta_{t,k}$  is the SESR threshold to be calibrated.  $\Delta SESR_{t,k}$  is the change of  
 280 SESR between consecutive time intervals.  $P_{40}$  is the 40th percentile of  $\Delta$ SESR values.  $P_{25}$  is the

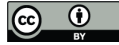

281 25th percentile threshold of  $\Delta\text{SESR}$ .  $\overline{\Delta\text{SESR}}_{AFD,p}$  is the mean  $\Delta\text{SESR}$  over the full agricultural  
 282 flash drought period.  $\wedge$  denotes the logical "and" condition.

283

284 Figure 3 illustrates an agricultural flash drought (AFD) event in 2014 in fine clay-loam soil at  
 285 one of the sample points. Panel (a) shows the SESR trajectory (black line) together with the  
 286 calibrated threshold (red dashed line). From mid-May to early July, SESR dropped below the  
 287 calibrated thresholds for 49 consecutive days. Panel (b) provides the  $\Delta\text{SESR}$  during the event.  
 288 Rapid intensification is confirmed when consecutive  $\Delta\text{SESR}$  values remained below the 40<sup>th</sup>  
 289 percentile, with only one exception allowed, which is marked here with an orange circle.  
 290 The mean ( $\mu$ ) of the  $\Delta\text{SESR}$  across the event also remained below the 25<sup>th</sup> percentile, reinforcing its  
 291 classification as an AFD. In the figure, the actual  $\mu(\Delta\text{SESR})$  and the 40<sup>th</sup> and 25<sup>th</sup> percentiles of  
 292 the time series are shown to better illustrate the example. Detection therefore requires both  
 293 sustained low SESR and rapid intensification, with the calibrated SESR threshold governing the  
 294 event onset in this example.

295

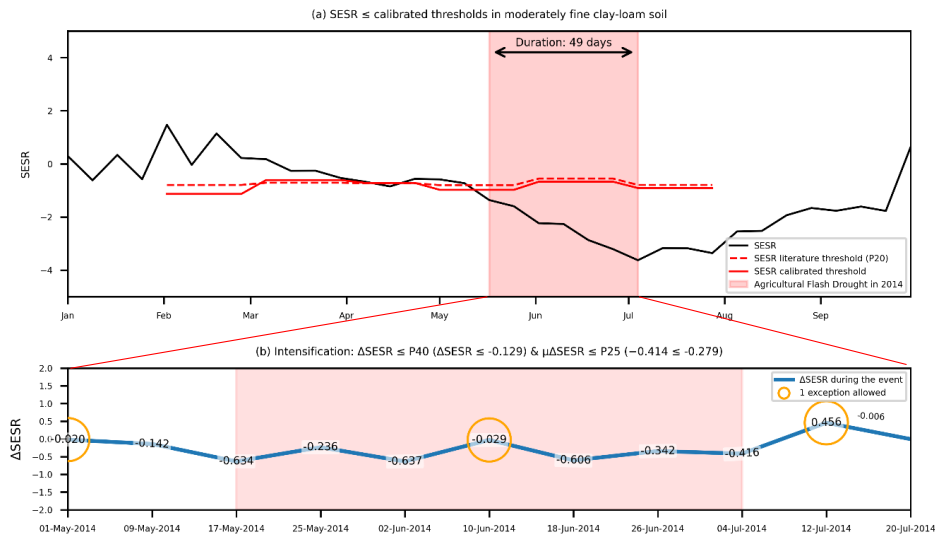

296

297 Figure 3 Time-series schematic showing how calibrated SESR thresholds and rapid  
 298 intensification of SESR are used to detect agricultural flash drought in 2014. (a) SESR evolution  
 299 relative to the literature-based threshold (P20) and the calibrated threshold ( $\theta_{t,k}$ ). The shaded  
 300 period indicates the detected agricultural flash drought, which begins when SESR first falls  
 301 below the calibrated threshold (On May 17) and persists until recovery due to the criteria for  
 302  $\Delta\text{SESR}$  being above the representative threshold. (b) Corresponding changes of SESR ( $\Delta\text{SESR}$ )  
 303 during the same period, used to confirm rapid intensification.

### 304 2.3.4 Diagnostic assessment of the agricultural relevance of SESR prior to calibration

305 Three diagnostic assessments were conducted to assess whether SESR functions as a potential  
 306 agricultural indicator of evaporative stress linked to drought-induced crop losses. The first  
 307 assessment examines the consistency between SESR and Vegetation Health Index (VHI) using  
 308 aggregated data from all soil textures across the sample locations. To achieve this, a linear  
 309 regression and Pearson correlation analyses were performed between SESR and VHI using two  
 310 representative years: one with confirmed crop losses caused by drought and one with no reported  
 311 losses.



312 The second assessment analyses the distribution of evaporative stress across crop management  
 313 periods and soil texture classes. Its aim is to determine whether evaporative stress (SESR) differs  
 314 between years with drought-induced crop losses and non-drought years when no losses occurred,  
 315 with the VHI benchmark used to identify years with drought-induced crop losses. For each  
 316 sample location the SESR time series were extracted in their original 8-day resolution for the  
 317 period from February to July. Two datasets of SESR values were then created, one for years with  
 318 and one for years without drought-induced crop losses. The distribution of the SESR values were  
 319 visualised using boxplots by crop management periods and soil texture classes. As most SESR  
 320 distributions deviated from normality (tested using Shapiro–Wilk normality test) (Ghasemi and  
 321 Zahediasl, 2012), non-parametric tests, including Mann–Whitney U and Kolmogorov–Smirnov  
 322 tests (Sawilowsky, 2005) were applied. Significant differences ( $p < 0.05$ ) indicated that the SESR  
 323 distributions differed between drought-induced crop loss and non-drought years.

### 325 2.3.5 Calibration of SESR thresholds, performance metrics, and uncertainty-based selection

326  
 327 The calibration aimed to identify SESR threshold values that best separate years with and without  
 328 drought-induced crop losses by maximising the  $F_{\beta}$  score, thereby determining the evaporative  
 329 stress associated with the occurrence of agricultural impacts. SESR threshold calibration was  
 330 performed from 2000 to 2013 using SESR datasets constructed in Section 2.3.4, stratified by  
 331 crop management periods and soil texture classes. Within each stratum, SESR observations were  
 332 classified into two classes, positive and negative, corresponding to years with and without  
 333 drought-induced crop losses. As the number of SESR time series (sample locations) were  
 334 imbalanced between classes, inverse-frequency weighting was applied (Cao et al., 2019).  
 335 Subsequently, these classes were used jointly during thresholds optimisation to evaluate  
 336 candidate SESR thresholds. A set of candidate thresholds was defined as SESR values ranging  
 337 between the second and ninety-fifth percentiles of the SESR distributions. For each candidate  
 338 threshold, SESR values were converted into a binary classification distinguishing drought-  
 339 impact conditions from non-impact conditions. These candidate thresholds were evaluated using  
 340 an empirical-utility maximisation approach (Nan et al., 2012), in which thresholds were selected  
 341 by maximising the  $F_{\beta}$  score ( $\beta = 0.3$ ) for each crop management period and soil texture. For each  
 342 candidate threshold, precision and recall were first computed and then the corresponding  $F_{\beta}$  score  
 343 was derived. Precision represents the proportion of true positive results among all events  
 344 classified as positive, whereas recall represents the proportion of true positive detections among  
 345 all actual positive events in the data. The parameter  $\beta$  controls the relative weighting of precision  
 346 and recall through the  $\beta^2$  terms, with lower values ( $\leq 0.5$ ) of  $\beta$  placing greater emphasis on  
 347 precision and higher values ( $\geq 0.5$ ) increasing the contribution of recall to the  $F_{\beta}$  score. The  $F_{\beta}$   
 348 metric is expressed as:

$$349 \quad F_{\beta} = \frac{(1 + \beta^2) P \cdot R}{\beta^2 P + R} \quad (4)$$

350 where  $P$  is precision,  $R$  is recall, and the  $F_{\beta}$  score represents an adjusted balance that weights  $P$   
 351 and  $R$  depending on the value of  $\beta$ .  $\beta$  is set to 0.3 to represent the preference of stakeholders for  
 352 missed events over false alarms (Guimarães Nobre et al., 2023). During calibration, the tested  
 353 candidate thresholds were explored using a 0.01 step size for fine exploration. A time step was  
 354 classified as drought when the SESR value fell below the candidate threshold. To assess  
 355 threshold robustness, the stability of the calibrated thresholds was evaluated by quantifying  
 356 sampling uncertainty using cluster-level bootstrapping (Padiyedath Gopalan et al., 2019) with  
 357 1000 replicates (Efron and Tibshirani, 1986). The bootstrap was applied at the year–location  
 358 level, resampling complete SESR time series (February–July) with replacement. Each bootstrap  
 359 replicate produced an optimal threshold, and the resulting empirical distribution of calibrated  
 360 thresholds was summarised using the median, standard deviation, and 95% confidence interval



361 (CI95%) to characterise variability and uncertainty. In addition to uncertainty assessment, the  
 362 calibrated thresholds were also assessed using the false alarm rate (FAR) and Receiver Operating  
 363 Characteristics Curve (ROC) and its Area Under Curve (AUC). Lower FAR values ( $\leq 0.2$ )  
 364 indicate fewer false drought detections, whereas higher FAR values ( $\geq 0.5$ ) indicate a higher  
 365 frequency of false alarms. AUC values greater than 0.5 indicate that the thresholds provide  
 366 discriminatory ability between years with and without drought-induced crop losses (Marzban,  
 367 2004). These performance and uncertainty metrics, together with the precision metric, were used  
 368 to select the final set of calibrated thresholds, retaining only those values of thresholds as skilful  
 369 that simultaneously satisfy the following criteria: precision  $\geq 0.70$ , FAR  $\leq 0.30$ , ROC-AUC  $\geq$   
 370 0.60, and CI95%  $\leq 0.40$ . These criteria were chosen to approximate likely stakeholder  
 371 preferences for reliable drought detection with limited false alarms, while maintaining acceptable  
 372 discriminatory skill and stable thresholds estimates.  
 373

### 374 2.3.6 Validation strategy of literature-based and calibrated SESR thresholds

375 Using two validation metrics, the validation step assessed the ability of both literature-based and  
 376 calibrated SESR thresholds to identify flash drought events for each crop management period  
 377 and soil texture that coincide with years associated with drought-induced crop losses. The  
 378 validation was performed only for the skilful thresholds identified during calibration, as  
 379 described above. SESR thresholds validation was conducted from 2014 to 2024 using two  
 380 distinct agricultural benchmarks: (1) drought-induced crop loss signals derived from the VHI  
 381 and (2) documented historical drought-induced crop losses reported. The first validation metric  
 382 ( $V_1$ ) was defined as:

$$383 \quad V_1 = \begin{cases} 1, & FD_t = 1 \text{ and } cl_t = 1 \\ 0, & \text{otherwise} \end{cases} \quad (5)$$

384 Where  $V_1$  represents the validation criterion,  $FD_t$  denotes a flash drought event identified at time  
 385  $t$ , and  $cl_t$  represents the crop loss condition at the end of the first cropping cycle (here, August).  
 386 A second validation metric ( $V_2$ ) was defined to assess whether flash drought events coincide with  
 387 reported drought-induced crop losses:

$$388 \quad V_2 = \begin{cases} 1, & \text{if } FD_t = 1 \text{ and } dci_t = 1 \\ 0, & \text{otherwise} \end{cases} \quad (6)$$

389  
 390 Where  $V_2$  represents validation criterion, and  $dci_t$  denotes documented drought-induced crop  
 391 impacts for September, as defined in developing the impact benchmark.

## 392 3. Results

### 393 3.1 Agricultural relevance of the Standardized Evaporative Stress Ratio (SESR)

394 Figure 4 presents the regression equations and correlation coefficient that describe the  
 395 relationship between SESR and VHI in both conditions for a year (2014) with and without (2013)  
 396 drought-induced crop losses. Although the relationship between SESR and VHI is positive in  
 397 both years, a smaller slope ( $b=1.49$ ) and correlation ( $r=0.29$ ) in 2013 indicate a weak  
 398 relationship, while in 2014 the clearer slope ( $b=3.94$ ) and correlation ( $r=0.63$ ) suggest a stronger  
 399 vegetation response to evaporative stress during drought years with confirmed crop losses. The  
 400 distribution of SESR values at the lower VHI values indicates poor vegetation health and aligns  
 401 with more negative SESR values, reflecting stronger evaporative stress. Although correlation  
 402 does not imply causation, the fact that these differences emerge even in a naturally dry  
 403 environment like the Dry Corridor indicates that SESR provides a meaningful signal that is  
 404 coherent with vegetation stress during drought years with confirmed crop losses.  
 405



406 Boxplots of SESR distributions (Figure 5), together with the statistical difference tests (see  
407 Figure S2), illustrate how evaporative stress varies across crop management periods and soil  
408 textures between years with and without drought-induced crop losses. During February and  
409 March, SESR distributions exhibit strong overlap in both medians and interquartile ranges  
410 (IQRs), indicating limited separation between conditions. From April onwards, separation begins  
411 to emerge, with the clearest differences occurring in May–July, when years with drought-  
412 induced crop losses consistently show lower SESR medians across all soil textures. This  
413 separation is weakest in coarse sandy soils, where IQRs remain large and strongly overlapping.  
414 In contrast, it is strongest in finer-textured soils (moderately fine clay loam, fine clayey, and very  
415 expansive clayey), where a persistent downward shift in the median occurs without a  
416 corresponding increase in distributional spread. During June–July, separation further increases  
417 due to more frequent and more negative SESR values, particularly in fine-texture soils,  
418 indicating that the late period differences arise from both shifts in typical conditions (lower  
419 medians) and enhanced lower tail behaviour.

420

421 The relatively low discrimination of SESR in sandy soils between drought-induced crop loss  
422 years may be explained by their high permeability and low water-holding capacity (Jabro et al.,  
423 2009; Wankmüller et al., 2024), which cause rapid responses to evaporative demand even in  
424 years without crop losses. Consistent with this behaviour, statistical tests show no significant  
425 differences in SESR between years for sandy soils (Figure S2). In contrast, the stronger  
426 discrimination observed in clay-rich soils is likely linked to their higher water retention capacity  
427 (Or and Lehmann, 2019; Sun et al., 2019), which allows evaporative stress signals to persist  
428 longer and enhances the contrast in SESR between drought-induced crop loss and no-drought  
429 years. This separation is supported by statistically differences ( $p < 0.05$ ) in both tests (Figure  
430 S2). Moreover, the upper and lower tails of the SESR distribution in these soils exhibit  
431 comparable lengths, indicating that the area experiences a balanced range of extreme transitions  
432 rather than being dominated exclusively by drying or wetting anomalies. This balance enables  
433 SESR to capture both the intensification and easing of evaporative stress, thereby supporting a  
434 more reliable identification of stress related thresholds.

435

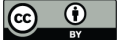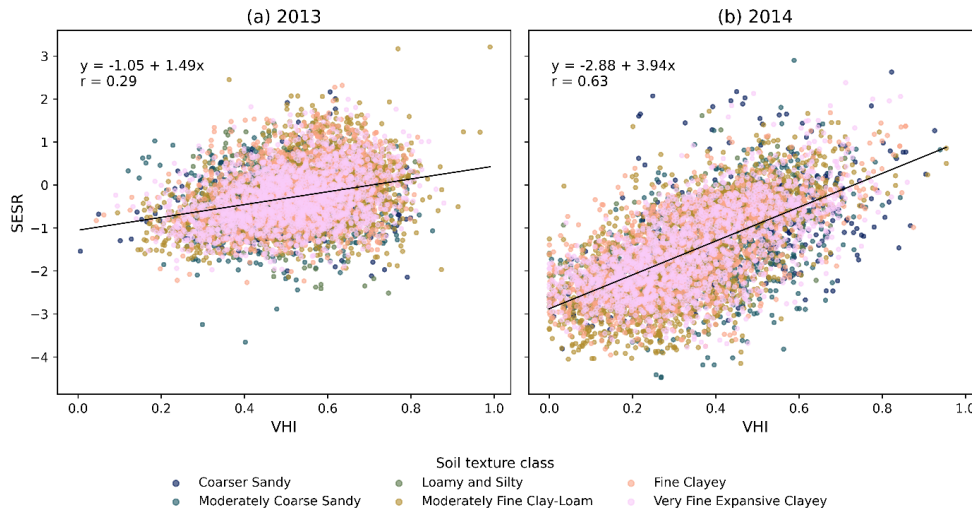

436  
 437 Figure 4. Scatterplots of the relationship between SESR and VHI from February to July in (a)  
 438 2013 (year without drought) and (b) 2014 (drought year with confirmed crop losses), with data  
 439 aggregating across all soil textures at the sample locations. Each panel includes the fitted linear  
 440 regression line, the regression equation ( $y$ ), and the Pearson correlation coefficient ( $r$ ).

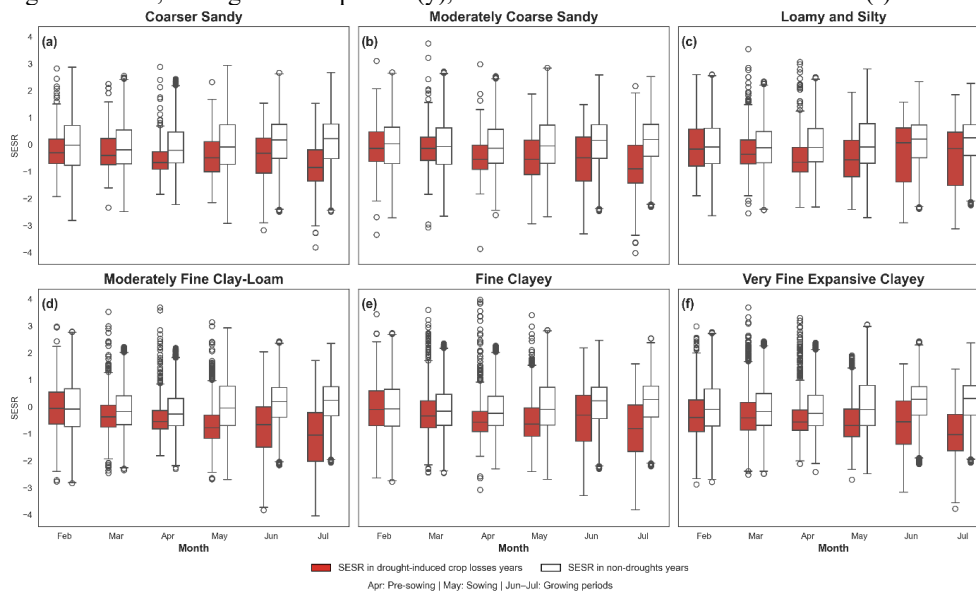

441  
 442 Figure 5 Panel (a)–(f) Standardized Evaporative Stress Ratio (SESR) aggregated across crop  
 443 management periods and soil texture classes at the sample locations for years with and without  
 444 drought-induced crop losses.

### 445 3.2 Performance of calibrated SESR thresholds across crop management period and soil 446 textures

447 Figure 6 shows how the median performance metrics of precision, recall, FAR (False Alarm  
 448 Rate) and  $F_{\beta}$  vary as the value of the thresholds  $\theta_{t,k}$  (Eq. 3). This allows identification of the



449 thresholds for each crop management period and soil texture that achieves the best combination  
450 as expressed by  $F_{\beta}$ . In each panel, the calibrated threshold ( $\theta_{t,k}$ ) is indicated by a solid vertical  
451 line, with the value indicated in the title. The literature-based threshold is shown as a dotted  
452 vertical line reference. While Figure 6 illustrates the overall median behaviour of the metrics  
453 across the thresholds range, the numerical values discussed below refer specifically to the values  
454 of the performance metrics at the calibrated thresholds. Figure 7 summarizes where SESR  
455 thresholds exhibit skill across periods and soils.

456 In all soil textures, higher values of the SESR thresholds increases recall and FAR and decreases  
457 precision. The metric combinations at the  $F_{\beta}$  maximum differ across soil textures and crop  
458 management periods. During the pre-sowing period (April), loamy and silty soils exhibit  
459 calibrated thresholds with balanced precision ( $\approx 0.83$ ) and recall ( $\approx 0.68$ ), while coarser sandy  
460 soils show lower recall ( $\approx 0.43$ – $0.66$ ) and higher FAR ( $> 0.20$ ). During the sowing period (May),  
461 most soils are characterised by calibrated thresholds with reduced recall ( $< 0.45$ ) and FAR  
462 typically below 0.12, including moderately coarse sandy, loamy–silty, and clay–loam soils. In  
463 contrast, during the growing period (June–July), calibrated thresholds in nearly all soil textures  
464 have high precision ( $> 0.84$ ) and low FAR ( $< 0.12$ ), while recall varies across soils, ranging from  
465 approximately 0.32 in coarser sandy soils to above 0.68 in fine and very fine clayey soils. Lower  
466 discrimination skills is mainly observed during the pre-sowing (April), and sowing (May) periods  
467 for several soil textures, including coarse sandy, moderately coarse sandy, and loamy–silty soils  
468 ( $AUC \leq 0.70$ , Figure 7). In contrast, higher discrimination skill is consistently observed during  
469 the growing period (June–July) across most soil textures, with AUC values commonly  
470 exceeding 0.80 and reaching above 0.90 in fine and very clayey soils for individual sample  
471 points.

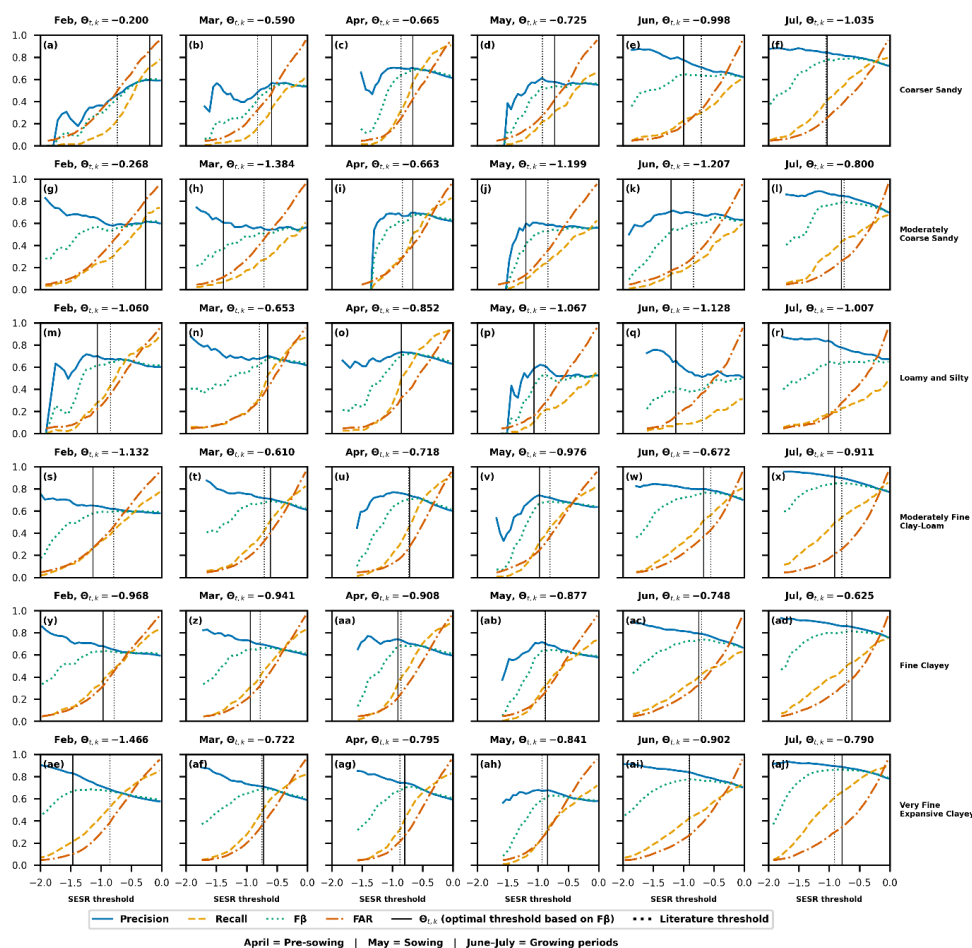

472

473

474

475

476

477

Figure 6 Median performance metrics of SESR thresholds across crop management periods and sample points for each soil texture, including precision, recall,  $F\beta$ , and False Alarm Rate (FAR) evaluated over the full thresholds range. Solid vertical line denotes the optimal calibrated thresholds ( $\theta_{t,k}$ ), while the dotted vertical line shows reference thresholds from literature. Note that the z-score of the literature thresholds is derived from the empirical distribution of SESR.

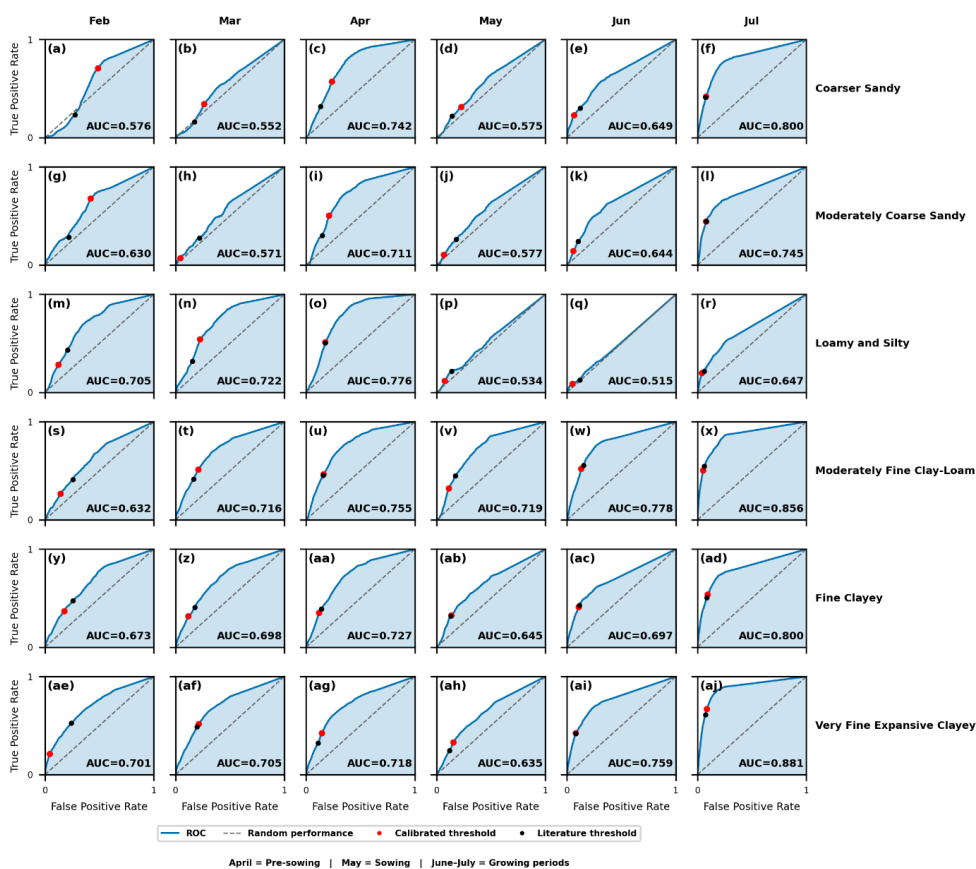

478

479 Figure 7 Median Receiver-Operating Characteristics Curve (ROC) values across crop  
 480 management periods and sample points for each soil textures.

### 481 3.3 Stability and uncertainty of SESR thresholds

482

483 Figure 8 show the uncertainty in the optimal SESR-based thresholds across crop management  
 484 periods and soil textures, expressed by the CI95 metric. Cells with a solid black outline indicate  
 485 soil-month combinations for which the thresholds simultaneously satisfy the predefined criteria:  
 486 precision  $\geq 0.70$ , FAR  $\leq 0.30$ , ROC-AUC  $\geq 0.60$ , and CI95%  $\leq 0.40$ . Only these thresholds were  
 487 retained for validation.

488 Threshold uncertainty varies across both crop management periods and soil textures. Sandy soils  
 489 (coarse sandy and moderately coarse sandy) exhibit the highest CI95 range during the selected  
 490 period. In contrast, intermediate and fine-textured soils show lower CI95 range. **Skilful**  
 491 **thresholds** are identified for loamy and silty soils during March and April (pre-sowing period),  
 492 for moderately fine clay-loam soils during April and June–July (growing period), and for very  
 493 expansive clayey soils from March through July (growing period). Fine clayey soils show  
 494 intermediate uncertainty, with CI95 ranges exceeding the selection threshold in most months.  
 495 Figure S3 illustrates the full distribution of the calibrated SESR thresholds.

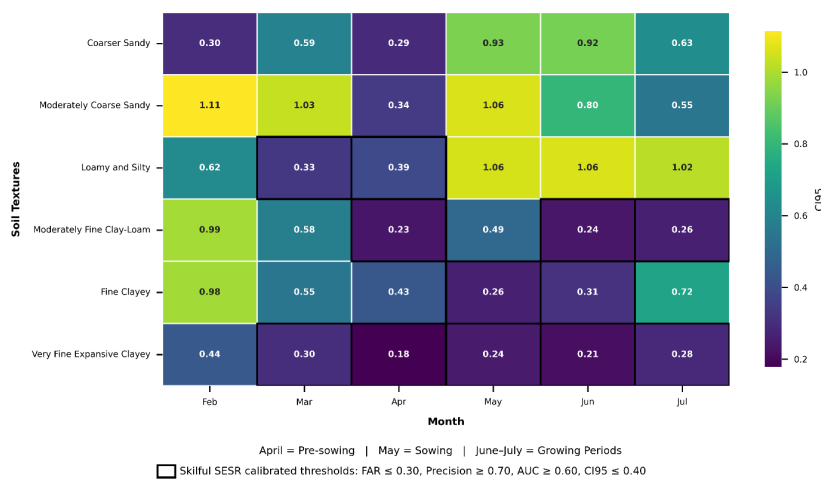

496

497 Figure 8 Uncertainty level of optimal thresholds by crop management periods and soil textures.  
 498 The black cell shows the optimal thresholds that simultaneously satisfied the following criteria:  
 499 precision ≥ 0.70, FAR ≤ 0.30, ROC-AUC ≥ 0.60, and CI95% ≤ 0.40.

### 500 3.4 Validation of literature-based and calibrated SESR thresholds

501

502 Figure 9 illustrates years in which flash droughts are detected using calibrated thresholds and  
 503 literature-based thresholds for the validation period (2014-2024), and how these align against  
 504 years with crop losses. This shows that flash drought events that are detected using calibrated  
 505 thresholds appear in more years and across more soil textures than those detected using literature-  
 506 based thresholds. In moderately fine clay-loam, fine clayey, and very fine expansive clayey soils,  
 507 calibrated thresholds detections are present in several years in which crop losses are also shown.  
 508 In contrast, detections based on literature thresholds are absent or limited to fewer years for these  
 509 same soils. In loamy and silty soils, both calibrated and literature-based flash drought detections  
 510 occur less frequently, and several years with crop losses do not show a corresponding flash  
 511 drought detection. Across all soil textures, there are also years in which flash drought detection  
 512 occur without accompanying crop losses, and years in which crop losses occur without flash  
 513 drought detections. Supplementary Figures S4 and S5 summarise the hit rates between flash  
 514 droughts detected using literature (column left) and calibrated-based thresholds versus crop  
 515 losses detected via VHI and reports. For all soil textures, hit rates are zero or low during the pre-  
 516 sowing and sowing periods. During the growing period (June-July), calibrated thresholds yield  
 517 consistently higher hit rates than literature-based thresholds across all soil textures, with the  
 518 highest values observed in moderately fine clay-loam and fine clayey soils. In contrast, hit rates  
 519 associated with literature-based thresholds remain low across all periods and soil textures.  
 520

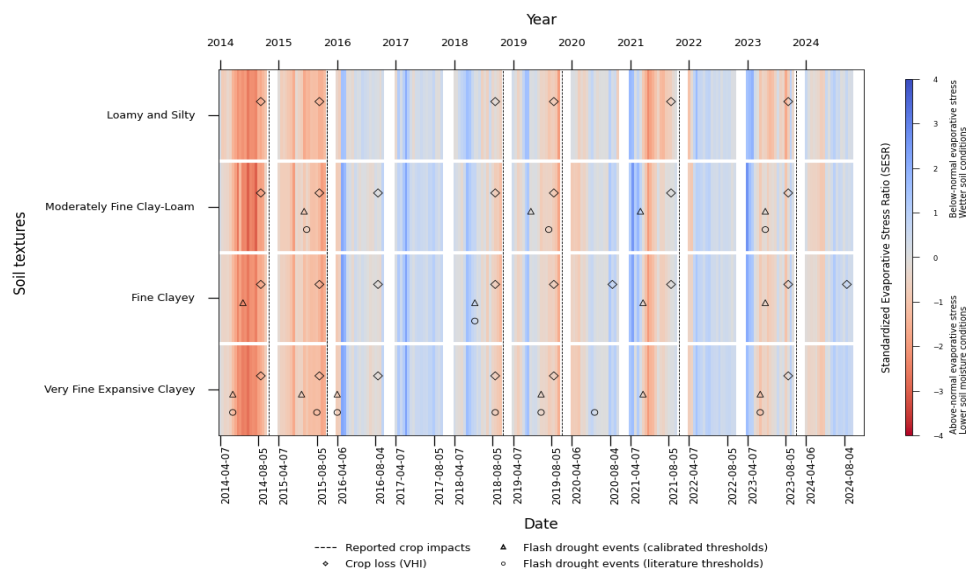

521  
 522 Figure 9 Temporal alignment of flash droughts events and crop losses identified via VHI and  
 523 newspapers/reports. The 8-day SESR time series for each soil texture is shown as the background  
 524 over the evaluation period. Flash drought events detected using calibrated and literature-based  
 525 thresholds, together with reported crop losses, are overlaid.

526 **4. Discussion**

527 **4.1 Relevance of SESR in detecting agricultural flash droughts**

528  
 529 Results show that the Standardized Evaporative Stress Ratio (SESR) captures a coherent signal  
 530 of higher evaporative stress during years in which crop losses are observed, as indicated by  
 531 contrasts in the SESR-VHI relationship between non-drought and drought years (Figure 4). This  
 532 indicates that SESR is coherent with vegetation stress during years with confirmed crop losses,  
 533 and consistent with the mechanism whereby vegetation becomes increasingly sensitive to  
 534 evaporative stress once soil moisture constraints emerge, while under non-limiting conditions  
 535 changes in evaporative demand do not translate into physiological stress (Anderson et al., 2016;  
 536 Hobbins and Huntington, 2016; Kozłowski, 1968). However, translating this signal into an  
 537 indicator of agricultural flash drought depends on how the onset threshold is defined within the  
 538 detection approach (Section 2.3.3). Analysis of the distribution of SESR values (Figure 5) shows  
 539 that more extreme SESR values occur during years with drought-induced crop losses. Although  
 540 literature-based and calibrated thresholds are derived separately for each crop management  
 541 period and soil texture, they approach similar values in a limited number of cases (Figure 6), this  
 542 behaviour is not consistent across soil textures and crop management periods. This inconsistency  
 543 arises because literature-based thresholds are defined solely by the statistical properties of the  
 544 SESR distribution (Christian et al., 2019), whereas calibrated thresholds are constrained by the  
 545 occurrence of observed crop losses (see sections 2.3.2, 2.3.3, 2.3.5), leading to different SESR  
 546 values being identified as agriculturally relevant even within the same soils texture and  
 547 management period. In the dry corridor of Central America, drought-induced crop losses occur  
 548 at SESR levels that depend on this approach rather than on percentile exceedance alone (see



549 Figures S4, S5). Consequently, calibrating using agricultural impact information improves the  
550 consistency in which SESR identifies agriculturally relevant flash droughts, compared to the use  
551 of fixed percentile threshold alone (Section 2.3.5).

552 This limitation in how flash drought onset is defined also has direct operational consequences  
553 for the alignment between detected events and observed crop losses. The default threshold  
554 ignores agricultural context and cannot be directly linked to the occurrence of crop losses. When  
555 detection occurs outside pre-sowing, sowing and growing periods, its operational value is limited  
556 (Bucheli et al., 2021), meaning that the occurrence of flash drought may then not correspond to  
557 crop losses (Teleubay et al., 2025), consistent with the low hit rates in Figures S4-S5. These  
558 limitations are reflected in the less consistent temporal alignment between literature-based  
559 detections and documented crop losses years, compared to the calibrated thresholds (Figure 9).  
560 Together, the results demonstrate that SESR provides signals of evaporative stress relevant for  
561 agricultural flash drought detection, but that in this dryland system such relevance requires  
562 context-specific, impact informed calibration rather than fixed percentile thresholds (Halwatura  
563 et al., 2017). These finding are also with a core principle of impact-based forecasting, namely  
564 that hazard signals must be translated into locally relevant impact thresholds to support  
565 meaningful early warning and decision-making (McEwen et al., 2021; Shyrokaya et al., 2024).

#### 566 **4.2 Behaviour of calibrated SESR thresholds across soil textures and crop management** 567 **periods to detect agricultural flash droughts** 568

569 The response of calibrated SESR thresholds across soil textures and crop management periods  
570 shows that flash drought detection depends on both the temporal evolution of evaporative stress  
571 and the capacity of each soil texture to store and release moisture during crop management  
572 periods. In the Dry Corridor in Nicaragua, high atmospheric demand marked by the transition  
573 between the dry season and the rainy season produces rapid fluctuations in soil moisture (Son et  
574 al., 2018). Because local maize and bean systems rely almost entirely on precipitation (van der  
575 Zee Arias et al., 2012), these moisture fluctuations coincide with short-term stress conditions  
576 that are reflected in SESR variability during drought years (Figure 5), thereby shaping the  
577 variability of SESR signals used for onset detection.  
578

579 Coarse and moderately sandy soils, with rapid drainage and low water capacity (Jabro et al.,  
580 2009; Wankmüller et al., 2024), generate short-lived and highly variable evaporative stress. As  
581 a result, SESR anomalies are less persistent and less clearly associated with crop losses, making  
582 the distribution of SESR values (Figures 5a,b) difficult to discriminate between years with and  
583 without identified crop losses (Figure 2), and resulting in calibrated thresholds characterised by  
584 high uncertainty (Figure 8). In contrast, clay-rich soils, characterised by greater water retention  
585 and slower drainage (Jabro et al., 2009), allow evaporative stress to persist over longer periods  
586 (Suliman et al., 2024; Wankmüller et al., 2024), which is reflected in the more stable calibrated  
587 thresholds in several clay soil classes and periods (Figure 8). Loamy–silty soils, which have  
588 intermediate porosity and water-holding capacity (Ma et al., 2015), exhibit a more mixed  
589 behaviour. Although they show clear separation of the SESR signal during pre-sowing, sowing  
590 and growing periods (Figure 5c), calibrated SESR thresholds for loamy–silty soils do have skill  
591 in the sowing month (Figure 8). These contrasts indicate that SESR-based detection is most  
592 reliable where soil moisture deficits persist long enough to affect crops, whereas rapidly draining  
593 soils reduce the operational usefulness of SESR as a standalone indicator.



594 The usefulness of calibrated SESR thresholds is governed not only by soil texture but also by  
595 the seasonal progression of evaporative stress across crop management periods (Son et al., 2018).  
596 During the dry season months that precede the sowing period, high evaporative stress dominates  
597 the SESR signal (Noguera et al., 2022; Otkin et al., 2018), producing large variability that often  
598 reflects background seasonal drying rather than short-term stress anomalies associated with  
599 agricultural impacts (Hobbins and Huntington, 2016). Under these conditions, SESR anomalies  
600 may reflect seasonal atmospheric demand rather than crop relevant moisture stress, reducing the  
601 reliability of thresholds-based detection. The effect of this background drying on detection  
602 performance differs by soil texture. In sandy soils, this short-lived evaporative stress variability  
603 produces high false alarm rates (FAR) and weak discrimination in some months (Figure 7),  
604 together with the wide uncertainty ranges in calibrated thresholds (Figure 8).

605 Once precipitation begins to moderate evaporative stress (see SESR heatmap across years and  
606 months aggregated at each 8-day interval in Figure 2) in the sowing period in May and during  
607 the growing period in July for maize and beans (Figure 1), soil moisture is replenished more  
608 regularly (Son et al., 2018), which reduces the gap between ET and PET (Hobbins et al., 2019)  
609 and also reduces short-term variability in SESR (Noguera et al., 2022). Under these more stable  
610 conditions, SESR anomalies can more clearly reflect crop relevant moisture deficits in the soil-  
611 period combinations where skilful detection is observed (Anderson et al., 2016). This seasonal  
612 transition modifies the SESR signals, but ROC results indicate that skilful discrimination does  
613 not increase uniformly after rainfall onset (Figure 7). Instead, skill emerges only in specific soil  
614 period combinations, reflecting the interaction between seasonal moisture dynamics and soil  
615 water holding capacity. Operationally, this implies that SESR-based flash drought monitoring in  
616 dryland agricultural systems should focus on the specific soil-period combinations where skilful  
617 detection is observed, rather than applying a uniform approach across all soil textures and  
618 months.

### 619 **4.3 Operational relevance and limitations of calibrated SESR thresholds for flash drought** 620 **monitoring and management**

622 The calibrated thresholds reveal context-dependent limitations that must be recognised when  
623 integrating SESR into operational drought monitoring. In sandy soils, SESR shows limited  
624 ability to distinguish anomalous evaporative stress from background dryness signals (Hobbins  
625 and Huntington, 2016; Jabro et al., 2009), resulting in low detection skill and high uncertainty  
626 in calibrated thresholds. On the other hand, the skilful thresholds occur predominantly in clay-  
627 rich soils, which account for around ~90% of the study area (Figure 1), during pre-sowing,  
628 sowing, and growing periods and only during pre-sowing period in loamy–silty textures (Figure  
629 8). This spatial and temporal concentration of skilful thresholds indicates that SESR provides  
630 operational value only for specific combinations of crop management period and soil texture,  
631 and that its performance cannot be assumed outside these domains. Therefore, SESR-based  
632 monitoring could not be suitable as a uniformly applied early warning tool across all periods and  
633 soils, but rather as a selective component restricted to the conditions where calibrated thresholds  
634 demonstrate stability and skill. Even in these settings, SESR-based detections would benefit from  
635 verification using complementary information, such as soil moisture indicators, land surface  
636 temperature or field-based agronomic observations, to confirm or filter detections (Torelló-  
637 Sentelles and Franzke, 2022), and to avoid overinterpreting SESR signals in such settings, as  
638 documented in previous studies in dryland regions such as located in Central America (Kibler et

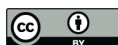

639 al., 2023; Quichimbo et al., 2021; Sun et al., 2019). Additionally, the operational relevance of  
640 SESR thresholds depends on the trade-off between high recall and low precision that local  
641 governments, managers and farmers are willing to accept (Guimarães Nobre et al., 2023). The  
642 choice of the optimal threshold based on the maximum value of  $F_{\beta}$  is conditioned by the  
643 parameter  $\beta$ , which determines how the system balances missed events and false alarms (Gallear  
644 et al., 2025). In this study, thresholds were selected to favour precision, consistent with a context  
645 where false alarms carry high costs (Guimarães Nobre et al., 2019) and institutional response  
646 capacity is limited. Under this configuration ( $\beta=0.3$ ), the optimal threshold shifts towards more  
647 negative values. This reduces false alarms (FAR) but increases the likelihood of missing early  
648 flash drought development. When  $\beta=1$ , which prioritises recall, thresholds shift toward less  
649 negative SESR values, increasing detection under weaker stress and thereby increasing FAR.  
650 This behaviour of SESR as an indicator is consistent with findings with other indicators in  
651 Halwatura et al., 2017; Gallear et al., 2025; Torelló-Sentelles and Franzke, 2022. As discussed  
652 in the literature, decision-makers often avoid acting when uncertainty is high, because the  
653 penalties associated with false alarms are visible, whereas the benefits of early actions are less  
654 immediately apparent (Bailey, 2012).

655 These decision rules ultimately depend on local decision-makers needing to prioritise  
656 (Guimarães Nobre et al., 2019; Lopez and Haines, 2017), and in the rainfed dry corridor of  
657 Central America, this statistical trade-off translates directly into an economic one. By mid-May,  
658 farmers have already committed financial resources—loans, fertiliser, purchases and labour—  
659 (van der Zee Arias et al., 2012). Because flash droughts typically evolve over timescales  
660 comparable to the sowing period (~30 days), prioritising precision may reduce false alarms  
661 (Gallear et al., 2025) but delay response, thus limiting the opportunity to reschedule planting or  
662 implement mitigation (Solh and van Ginkel, 2014). Conversely, favouring recall in May may  
663 increase early detection even under weak stress signals (Halwatura et al., 2017) and enable  
664 preventive action, but at potentially high implementation costs. In line with principles discussed  
665 in the impact-based forecasting (Shyrokaya et al., 2024), a more appropriate strategy would be  
666 to redefine the objective function according to economic risk (Bailey, 2012; Portele et al., 2021;  
667 Salmoral et al., 2019) and cost-loss analysis (Zhu et al., 2002), as well as the participation of  
668 stakeholders rather than purely statistical criteria (McEwen et al., 2021). Although this study  
669 dynamically adjusted the optimal thresholds to reflect the spatial and temporal variability,  
670 considering crop management periods and soil textures, fully operational deployment would  
671 require extending this approach to explicitly account for economic risk and decision-making  
672 constraints.

## 673 5. Conclusions

674

675 In this study, a context-specific threshold calibration approach was developed to improve the  
676 spatial and temporal detection of agricultural flash drought conditions in support of drought  
677 monitoring and management. The study was conducted in the Central America Dry Corridor, a  
678 dryland region in Nicaragua that is representative of rainfed agricultural systems exposed to  
679 short-lived but intense evaporative stress found in many tropical drylands worldwide. The  
680 approach uses the Standardized Evaporative Stress Ratio (SESR), together with its rate of change  
681 ( $\Delta$ SESR), and calibrates SESR thresholds using two benchmarks of observed drought-induced  
682 crop loss impacts. Calibrated SESR thresholds were evaluated across crop management periods  
683 and soil textures. The conclusions are summarised below:

684



- 685
- 686
- 687
- 688
- 689
- 690
- 691
- 692
- 693
- 694
- 695
- 696
- 697
- 698
- 699
- 700
- 701
- 702
- 703
- 704
- 705
- 706
- 707
- 708
- 709
- 710
- 711
- 712
- 713
- 714
- 715
- 716
- 717
- 718
- 719
- 720
- 721
- 722
- Although SESR contains coherent signals of evaporative stress intensification during years with drought-induced crop losses, default thresholds used in the literature do not translate this signal into a useful indicator of agricultural relevance. These default thresholds frequently identify stress conditions in years without reported losses while failing to capture the more extreme SESR values at which agricultural impacts are observed in this dryland context. As a result, literature-based thresholds show limited suitability for operational flash drought monitoring in the study region.
  - Calibrated thresholds reveal that the detectability of agriculturally relevant flash drought conditions using SESR depends jointly on crop management periods and soil textures. Skilful thresholds could not be found in sandy soils, where rapid soil moisture fluctuations limit the persistence of evaporative stress signals rather than the occurrence of agricultural impacts themselves. In contrast, clay-rich soils exhibit stable and skilful thresholds during specific crop management periods within pre-sowing, sowing and growing periods (April to July), with the skilful months varying among individual clay-rich soils classes. Loamy–silty soils showed intermediate behaviour, with skilful thresholds only in March and the pre-sowing period in April. These results indicate that SESR-based flash drought detection cannot be generalised uniformly across space or time but instead depends on the interaction between soil hydraulic properties and seasonal evolution of evaporative stress.
  - Validation against the agricultural benchmarks confirms that calibrated thresholds detect flash drought conditions more frequently in years that also exhibit drought-induced crop losses than literature-based thresholds, while still producing detections in some years without reported losses and missing impacts in others. This indicates that SESR thresholds can provide operationally relevant but conditional information, with useful performance confined to specific soil-crop management period combinations, particularly during the growing period, where threshold stability and detection skill are jointly satisfied. More broadly, these findings support ongoing effort toward impact-based drought monitoring and early warning by showing that physically based indicators such as SESR require calibration against observed agricultural impacts to be operationally meaningful. Rather than assuming that evaporative stress thresholds alone are sufficient to indicate agricultural impacts, this study demonstrates that linking SESR-based stress signals to crop losses and crop management periods improves their relevance for agricultural decision-making. At the same time, the results highlight that fixed percentile thresholds are insufficient in heterogeneous dryland environments, where translation from physical stress to agricultural impact is strongly context dependent.

723 This research provides temporally and spatially calibrated thresholds for agricultural flash  
724 drought detection in the Central America Dry Corridor, further work is needed to generalise and  
725 deepen these findings. As the approach itself is generalisable, future research should test the skill  
726 of flash drought detection using calibrated thresholds in other dryland regions and cropping  
727 systems. Additionally, further research should explore adding complementary variables in  
728 settings where SESR alone does not sufficiently discriminate impact-relevant stress conditions.  
729 Finally, threshold selection cannot be reduced to mechanical optimisation of statistical metrics;  
730 effective operational use requires explicit consideration of economic risk, stakeholder priorities,  
731 and the asymmetric consequences of missed events and false alarms so that SESR-based alerts  
732 support timely, informed, and context-appropriate decision-making for farmers and institutions.



733 **6. Data availability and code**

734 The data and code are available on request.

735 **7. Author contributions**

736 IU-T: conceptualisation (lead), methodology (lead), investigation (lead), formal analysis (lead),  
737 data curation and coding (lead), visualisation (lead), writing original draft, review and editing  
738 (lead), funding acquisition (lead). MW: conceptualisation (lead), methodology (lead), and  
739 supervision (lead). CB and MC, conceptualisation (supporting), methodology (supporting),  
740 supervision (supporting), GJ: conceptualisation (supporting), methodology (supporting),  
741 supervision (supporting), funding acquisition (lead). The first draft was written by IU-T, and all  
742 authors commented on previous versions of the manuscript.

743 **8. Competing of interests**

744 The author declares that none of the authors has any competing interests.

745 **9. Acknowledgments**

746 The author thanks the Schlumberger Foundation Faculty for the Future Fellowship Program for  
747 their financial support.

748 **10. Financial support**

749 This work was financially supported by the Schlumberger Foundation Faculty for the Future  
750 Fellowship Program.

751 **11. Bibliography**

752 Anderson, M. C., Zolin, C. A., Sentelhas, P. C., Hain, C. R., Semmens, K., Tugrul Yilmaz, M.,  
753 Gao, F., Otkin, J. A., Tetrault, R. The evaporative stress index as an indicator of agricultural  
754 drought in Brazil: an assessment based on crop yield impacts, *Remote Sens. Environ.*, 174, 82–  
755 99, <https://doi.org/10.1016/j.rse.2015.11.034>, 2016.

756 Bailey, R. *Famine early warning and early action: the cost of delay*. Chatham House, London,  
757 24 pp., 2012.  
758 [https://www.chathamhouse.org/sites/default/files/public/Research/Energy,%20Environment%20and%20Development/0712pr\\_bailey.pdf](https://www.chathamhouse.org/sites/default/files/public/Research/Energy,%20Environment%20and%20Development/0712pr_bailey.pdf)

760 Basara, J. B., Christian, J. I., Wakefield, R. A., Otkin, J. A., Hunt, E. H., Brown, D. P. The  
761 evolution, propagation, and spread of flash drought in the Central United States during 2012,  
762 *Environ. Res. Lett.*, 14, 084025, <https://doi.org/10.1088/1748-9326/ab2cc0>, 2019.

763 Bucheli, J., Dalhaus, T., Finger, R. The optimal drought index for designing weather index  
764 insurance, *Eur. Rev. Agric. Econ.*, 48, 573–597, <https://doi.org/10.1093/erae/jbaa014>, 2021.

765 Buitink, J., van Hateren, T. C., Teuling, A. J. Hydrological system complexity induces a  
766 drought frequency paradox, *Front. Water*, 3, 640976,  
767 <https://doi.org/10.3389/frwa.2021.640976>, 2021.

768 Cao, K., Wei, C., Gaidon, A., Arechiga, N., Ma, T. Learning imbalanced datasets with label-  
769 distribution-aware margin loss, *Adv. Neural Inf. Process. Syst.*, 32, 1567–1578, 2019.

770 Christian, J. I., Basara, J. B., Otkin, J. A., Hunt, E. D., Wakefield, R. A., Flanagan, P. X., Xiao,  
771 X. A methodology for flash drought identification: application of flash drought frequency

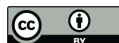

- 772 across the United States, *J. Hydrometeorol.*, 20, 833–846, [https://doi.org/10.1175/JHM-D-18-](https://doi.org/10.1175/JHM-D-18-0198.1)  
773 0198.1, 2019.
- 774 DGOT–INETER. Atlas nacional de suelos de la República de Nicaragua. Managua, Nicaragua,  
775 2024. <https://www.ineter.gob.ni/mapa/pub/atlassuelo/1erAltasNacionaldeSuelos.pdf>
- 776 Edris, S. G., Basara, J. B., Christian, J. I., Hunt, E. D., Otkin, J. A., Salesky, S. T., Illston, B. G.  
777 Analysis of the critical components of flash drought using the standardized evaporative stress  
778 ratio, *Agric. For. Meteorol.*, 330, 109288, <https://doi.org/10.1016/j.agrformet.2022.109288>,  
779 2023.
- 780 Efron, B., Tibshirani, R. Bootstrap methods for standard errors, confidence intervals, and other  
781 measures of statistical accuracy, *Stat. Sci.*, 1, 54–75, <https://doi.org/10.1214/ss/1177013815>,  
782 1986.
- 783 FAO. Vegetation health index near real time (Global - dekadal - 1 km) - ASIS (raster), FAO,  
784 2014. <https://www.fao.org/giews/earthobservation/access.jsp>
- 785 Fuganti, G., Minelli, M., Rojas, O. Practical guidelines for early warning–early action plans on  
786 agricultural drought. FAO, Rome, Italy, 2020. [https://openknowledge.fao.org/items/dd8ad74b-](https://openknowledge.fao.org/items/dd8ad74b-8c2f-40e6-b899-62e52d2aad07)  
787 8c2f-40e6-b899-62e52d2aad07
- 788 Gallear, J. W., Valadares Galdos, M., Zeri, M., Hartley, A. Evaluation of machine learning  
789 approaches for large-scale agricultural drought forecasts to improve monitoring and  
790 preparedness in Brazil, *Nat. Hazards Earth Syst. Sci.*, 25, 1521–1541,  
791 <https://doi.org/10.5194/nhess-25-1521-2025>, 2025.
- 792 Ghasemi, A., Zahediasl, S. Normality tests for statistical analysis: a guide for non-statisticians,  
793 *Int. J. Endocrinol. Metab.*, 10, 486–489, <https://doi.org/10.5812/ijem.3505>, 2012.
- 794 Gou, Q., Zhu, Y., Lü, H., Horton, R., Yu, X., Zhang, H., Wang, X., Su, J., Liu, E., Ding, Z.,  
795 Wang, Z., Yuan, F. Application of an improved spatio-temporal identification method of flash  
796 droughts, *J. Hydrol.*, 604, 127224, <https://doi.org/10.1016/j.jhydrol.2021.127224>, 2022.
- 797 Gu, Y., Wylie, B. K., Howard, D. M., Phuyal, K. P., Ji, L. NDVI saturation adjustment: a new  
798 approach for improving cropland performance estimates in the Greater Platte River Basin,  
799 USA, *Ecol. Indic.*, 30, 1–6, <https://doi.org/10.1016/j.ecolind.2013.01.041>, 2013.
- 800 Guimarães Nobre, G., Davenport, F., Bischiniotis, K., Veldkamp, T., Jongman, B., Funk, C.  
801 C., Husak, G., Ward, P. J., Aerts, J. C. J. H. Financing agricultural drought risk through ex-ante  
802 cash transfers, *Sci. Total Environ.*, 653, 523–535, 653, 523–535,  
803 <https://doi.org/10.1016/j.scitotenv.2018.10.406>, 2019.
- 804 Guimarães Nobre, G., Pasqui, M., Quaresima, S., Pieretto, S., Lemos Pereira Bonifácio, R. M.  
805 Forecasting, thresholds, and triggers: towards developing a forecast-based financing system for  
806 droughts in Mozambique, *Clim. Serv.*, 30, 100344,  
807 <https://doi.org/10.1016/j.cliser.2023.100344>, 2023.
- 808 Halwatura, D., McIntyre, N., Lechner, A. M., Arnold, S. Capability of meteorological drought  
809 indices for detecting soil moisture droughts, *J. Hydrol.: Reg. Stud.*, 12, 396–412,  
810 <https://doi.org/10.1016/j.ejrh.2017.06.001>, 2017.



- 811 Hobbins, M. T., Huntington, J. L. Evapotranspiration and evaporative demand. In: Singh, V. P.  
812 (Ed.), *Handbook of applied hydrology*, 2nd ed., McGraw-Hill Education, New York, USA,  
813 42.1–42.18, 2016.
- 814 Hobbins, M., Dewes, C., Huntington, J. L. Evaporative demand: dynamics and opportunities in  
815 drought early warning, monitoring, and vulnerability assessment. In: *Proceedings of the Sixth*  
816 *Interagency Conference on Research in the Watersheds*, DRI, Shepherdstown, USA, 211,  
817 2019.
- 818 INETER, ANA, UNI, and GIZ-PROATAS: Cuencas Hidrográficas de Nicaragua bajo la  
819 metodología Pfafstetter, 2014. [https://cira.unan.edu.ni/wp-content/uploads/2016/07/Album-](https://cira.unan.edu.ni/wp-content/uploads/2016/07/Album-Cuencas-Nic-Revisado_ANA.pdf)  
820 [Cuencas-Nic-Revisado\\_ANA.pdf](https://cira.unan.edu.ni/wp-content/uploads/2016/07/Album-Cuencas-Nic-Revisado_ANA.pdf)
- 821 Jabro, J. D., Evans, R. G., Kim, Y., Iversen, W. M. Estimating in situ soil–water retention and  
822 field water capacity in two contrasting soil textures, *Irrig. Sci.*, 27, 223–229,  
823 <https://doi.org/10.1007/s00271-008-0137-9>, 2009.
- 824 Kibler, C. L., Trugman, A. T., Roberts, D. A., Still, C. J., Scott, R. L., Caylor, K. K., Stella, J.  
825 C., Singer, M. B. Evapotranspiration regulates leaf temperature and respiration in dryland  
826 vegetation, *Agric. For. Meteorol.*, 339, 109560,  
827 <https://doi.org/10.1016/j.agrformet.2023.109560>, 2023.
- 828 Kogan, F. N. Application of vegetation index and brightness temperature for drought detection,  
829 *Adv. Space Res.*, 15, 91–100, [https://doi.org/10.1016/0273-1177\(95\)00079-T](https://doi.org/10.1016/0273-1177(95)00079-T), 1995.
- 830 Kozlowski, T. T.: *Water deficits and plant growth*, Academic Press, New York, 1968.
- 831 Leason, Z. T., Quiring, S. M., Svoboda, M. D. Utilizing objective drought severity thresholds to  
832 improve drought monitoring, *J. Appl. Meteorol. Climatol.*, 59, 1455–1470,  
833 <https://doi.org/10.1175/JAMC-D-19-0217.1>, 2020.
- 834 Li, X., Piao, S., Huntingford, C., Peñuelas, J., Yang, H., Xu, H., Chen, A., Friedlingstein, P.,  
835 Keenan, T. F., Sitch, S., Wang, X., Zscheischler, J., Mahecha, M. D. Global variations in  
836 critical drought thresholds that impact vegetation, *Natl. Sci. Rev.*, 10, nwad049,  
837 <https://doi.org/10.1093/nsr/nwad049>, 2023.
- 838 Lopez, A., Haines, S. Exploring the usability of probabilistic weather forecasts for water  
839 resources decision-making in the United Kingdom, *Weather Clim. Soc.*, 9, 701–715,  
840 <https://doi.org/10.1175/WCAS-D-16-0072.1>, 2017.
- 841 Lovino, M. A., Pierrestegui, M. J., Müller, O. V., Müller, G. V., Berbery, E. H. The prevalent  
842 life cycle of agricultural flash droughts, *npj Clim. Atmos. Sci.*, 7, 1–11,  
843 <https://doi.org/10.1038/s41612-024-00618-0>, 2024.
- 844 Ma, W., Zhang, X., Zhen, Q., Zhang, Y. Effect of soil texture on water infiltration in semiarid  
845 reclaimed land, *Water Qual. Res. J.*, 51, 33–41, <https://doi.org/10.2166/wqrjc.2015.025>, 2015.
- 846 Marzban, C. The ROC curve and the area under it as performance measures, *Weather*  
847 *Forecast.*, 19, 1106–1114, <https://doi.org/10.1175/825.1>, 2004.
- 848 McEwen, L., Bryan, K., Black, A., Blake, J., Afzal, M. Science-narrative explorations of  
849 drought thresholds in the maritime Eden catchment, Scotland: implications for local drought



- 850 risk management, *Front. Environ. Sci.*, 9, 589980, <https://doi.org/10.3389/fenvs.2021.589980>,  
851 2021.
- 852 Nan, Y., Chai, K. M., Lee, W. S., Chieu, H. L. Optimizing F-measure: a tale of two  
853 approaches, *Proc. 29th Int. Conf. Mach. Learn.*, arXiv:1206.4625,  
854 <https://doi.org/10.48550/arXiv.1206.4625>, 2012.
- 855 Nguyen, N. M., Choi, M. Delving into flash droughts in Vietnam during last two decades using  
856 the standardized evaporative stress ratio, *J. Hydrol.*, 634, 130669,  
857 <https://doi.org/10.1016/j.jhydrol.2024.130669>, 2024.
- 858 Noguera, I., Vicente-Serrano, S. M., Domínguez-Castro, F. The rise of atmospheric  
859 evaporative demand is increasing flash droughts in Spain during the warm season, *Geophys.*  
860 *Res. Lett.*, 49, e2021GL097703, <https://doi.org/10.1029/2021GL097703>, 2022.
- 861 Or, D., Lehmann, P. Surface evaporative capacitance: how soil type and rainfall characteristics  
862 affect global-scale surface evaporation, *Water Resour. Res.*, 55, 519–539,  
863 <https://doi.org/10.1029/2018WR024050>, 2019.
- 864 Otkin, J. A., Svoboda, M., Hunt, E. D., Ford, T. W., Anderson, M. C., Hain, C., and Basara, J.  
865 B.: Flash Droughts: A Review and Assessment of the Challenges Imposed by Rapid-Onset  
866 Droughts in the United States, *Bulletin of the American Meteorological Society*, 99, 911–919,  
867 <https://doi.org/10.1175/BAMS-D-17-0149.1>, 2018.
- 868 Otkin, J. A., Svoboda, M., Hunt, E. D., Ford, T. W., Anderson, M. C., Hain, C., Basara, J. B.  
869 Flash droughts: a review and assessment of the challenges imposed by rapid-onset droughts in  
870 the United States, *Bull. Am. Meteorol. Soc.*, 99, 911–919, <https://doi.org/10.1175/BAMS-D-21-0288.1>, 2022.
- 872 Padiyedath Gopalan, S., Kawamura, A., Amaguchi, H., Takasaki, T., Azhikodan, G. A  
873 bootstrap approach for the parameter uncertainty of an urban-specific rainfall–runoff model, *J.*  
874 *Hydrol.*, 579, 124195, <https://doi.org/10.1016/j.jhydrol.2019.124195>, 2019.
- 875 Portele, T. C., Lorenz, C., Dibrani, B., Laux, P., Bliefernicht, J., Kunstmann, H. Seasonal  
876 forecasts offer economic benefit for hydrological decision making in semi-arid regions, *Sci.*  
877 *Rep.*, 11, 10581, <https://doi.org/10.1038/s41598-021-89564-y>, 2021.
- 878 Quichimbo, E. A., Singer, M. B., Michaelides, K., Hobbey, D. E. J., Rosolem, R., Cuthbert, M.  
879 O. DRYP 1.0: a parsimonious hydrological model of dryland partitioning of the water balance,  
880 *Geosci. Model Dev.*, 14, 6893–6917, <https://doi.org/10.5194/gmd-14-6893-2021>, 2021.
- 881 Rojas, O. Agricultural extreme drought assessment at global level using the FAO-Agricultural  
882 Stress Index System (ASIS), *Weather Clim. Extremes*, 27, 100184,  
883 <https://doi.org/10.1016/j.wace.2018.09.001>, 2020.
- 884 Rojas, O., Rodríguez de España, M. V., Hernández, T. New canicula index to study its impact  
885 on agriculture in the Central American Dry Corridor and its connection with El Niño, FAO,  
886 Rome, Italy, 67 pp., <https://doi.org/10.4060/cb1818es>, 2020.
- 887 Salinas Marcenaro, I., Jarquin Diaz, J. R., Ortega Flores, G. J., Téllez Reyes, A. L. La  
888 evapotranspiración potencial en Nicaragua usando sensores remotos. Universidad Nacional  
889 Agraria, Managua, Nicaragua, 2023. <https://repositorio.una.edu.ni/4715/1/REN40U58.pdf>,



- 890 Salmoral, G., Rey, D., Rudd, A., de Margon, P., Holman, I. A probabilistic risk assessment of  
891 the national economic impacts of regulatory drought management on irrigated agriculture,  
892 *Earths Future*, 7, 178–196, <https://doi.org/10.1029/2018EF001092>, 2019.
- 893 Sawilowsky, S. Misconceptions leading to choosing the t test over the Wilcoxon Mann-  
894 Whitney test for shift in location parameter, *J. Mod. Appl. Stat. Methods*, 4, 598–600,  
895 <https://doi.org/10.22237/jmasm/1130804700>, 2005.
- 896 Shyrokaya, A., Pappenberger, F., Pechlivanidis, I., Messori, G., Khatami, S., Mazzoleni, M.,  
897 Di Baldassarre, G. Advances and gaps in the science and practice of impact-based forecasting  
898 of droughts, *WIREs Water*, 11, e1698, <https://doi.org/10.1002/wat2.1698>, 2024.
- 899 Solh, M., van Ginkel, M. Drought preparedness and drought mitigation in the developing  
900 world’s drylands, *Weather Clim. Extremes*, 3, 62–66,  
901 <https://doi.org/10.1016/j.wace.2014.03.003>, 2014.
- 902 Soltani, A., Meinke, H., de Voil, P. Assessing linear interpolation to generate daily radiation  
903 and temperature data for use in crop simulations, *Eur. J. Agron.*, 21, 133–148,  
904 [https://doi.org/10.1016/S1161-0301\(03\)00044-3](https://doi.org/10.1016/S1161-0301(03)00044-3), 2004.
- 905 Son, N.-T., Chen, C.-F., Chen, C.-R., Castellón, A., Masferrer, M.-G.-M., Recinos, L.-E.-M.  
906 Satellite characterization of drought over cultivated areas in Central America, *Int. J. Remote  
907 Sens.*, 39, 8505–8526, <https://doi.org/10.1080/01431161.2018.1488287>, 2018.
- 908 Steve, R., Qiaozhen, M., Maosheng, Z., and Alvaro, M. MODIS/Aqua Net Evapotranspiration  
909 Gap-Filled Yearly L4 Global 500m SIN Grid V061,  
910 <https://doi.org/10.5067/MODIS/MYD16A3GF.061>, 2021.
- 911 Suliman, M., Scaini, A., Manzoni, S., Vico, G. Soil properties modulate actual  
912 evapotranspiration, and precipitation impacts on crop yields in the USA, *Sci. Total Environ.*,  
913 949, 175172, <https://doi.org/10.1016/j.scitotenv.2024.175172>, 2024.
- 914 Sun, X., Wilcox, B. P., Zou, C. B. Evapotranspiration partitioning in dryland ecosystems: a  
915 global meta-analysis of in situ studies, *J. Hydrol.*, 576, 123–136,  
916 <https://doi.org/10.1016/j.jhydrol.2019.06.022>, 2019.
- 917 Svoboda, M., LeComte, D., Hayes, M., Heim, R., Gleason, K., Angel, J. J. R. J., Rippey, B.,  
918 Tinker, R., Palecki, M., Stooksbury, D., Miskus, D., Stephens, D. The Drought Monitor, *Bull.  
919 Am. Meteorol. Soc.*, 83, 1181–1190, [https://doi.org/10.1175/1520-  
0477\(2002\)083%253C1181:TDM%253E2.3.CO;2](https://doi.org/10.1175/1520-<br/>920 0477(2002)083%253C1181:TDM%253E2.3.CO;2), 2002.
- 921 Teleubay, Z., Quiring, S. M., Leasor, Z. Estimation of impacts-based drought thresholds for the  
922 U.S. Corn Belt, *Agric. For. Meteorol.*, 372, 110715,  
923 <https://doi.org/10.1016/j.agrformet.2025.110715>, 2025.
- 924 Teluguntla, P., Thenkabail, P., Oliphant, A., Gumma, M., Aneece, I., Foley, D., McCormick,  
925 R. Landsat-derived global rainfed and irrigated-cropland product, 30 m, version 001, NASA  
926 EOSDIS Land Processes DAAC,  
927 <https://doi.org/10.5067/COMMUNITY/LGRIP/LGRIP30.001>, 2023.
- 928 Teoh, K. K., Ibrahim, H., Bejo, S. K. Investigation on several basic interpolation methods for  
929 use in remote sensing application, in 2008 IEEE Conference on Innovative Technologies in



- 930 Intelligent Systems and Industrial Applications, 60–65,  
931 <https://doi.org/10.1109/CITISIA.2008.4607336>, 2008.
- 932 Torelló-Sentelles, H., Franzke, C. L. E. Drought impact links to meteorological drought  
933 indicators and predictability in Spain, *Hydrol. Earth Syst. Sci.*, 26, 1821–1844,  
934 <https://doi.org/10.5194/hess-26-1821-2022>, 2022.
- 935 Tu, Z., Yang, Y. On the estimation of potential evaporation under wet and dry conditions,  
936 *Water Resour. Res.*, 58, e2021WR031486, <https://doi.org/10.1029/2021WR031486>, 2022.
- 937 Ubeda Trujillo, I., Rocha, L. Dinámica de coberturas de la tierra en la subcuenca III de la  
938 cuenca sur del Lago de Managua, Nicaragua, *Rev. Torreón Univ.*, 9, 110–128,  
939 <https://doi.org/10.5377/torreon.v9i25.9857>, 2020.
- 940 Verbist, K., Maureira, H., Aroche, R. Midsummer drought atlas for Central America and the  
941 Caribbean. Water Centre for Arid and Semi-arid Zones of Latin America and the Caribbean  
942 (UNESCO), 46 pp., 2018.
- 943 Wankmüller, F. J. P., Delval, L., Lehmann, P., Baur, M. J., Cecere, A., Wolf, S., Or, D.,  
944 Javaux, M., Carminati, A. Global influence of soil texture on ecosystem water limitation,  
945 *Nature*, 635, 631–636, <https://doi.org/10.1038/s41586-024-08089-2>, 2024.
- 946 Yu, M., Zhang, J., Wei, L., Wang, G., Dong, W., Liu, X. Impact of soil textures on agricultural  
947 drought evolution and field capacity estimation in humid regions, *J. Hydrol.*, 626, 130257,  
948 <https://doi.org/10.1016/j.jhydrol.2023.130257>, 2023.
- 949 Yuan, X., Wang, L., Wu, P., Ji, P., Sheffield, J., Zhang, M. Anthropogenic shift towards higher  
950 risk of flash drought over China, *Nat. Commun.*, 10, 4661, <https://doi.org/10.1038/s41467-019-12692-7>, 2019.
- 952 Yuan, X., Wang, Y., Ji, P., Wu, P., Sheffield, J., Otkin, J. A. A global transition to flash  
953 droughts under climate change, *Science.*, 380, 187–191,  
954 <https://doi.org/10.1126/science.abn6301>, 2023.
- 955 van der Zee Arias, A., van der Zee, J., Meyrat, A., Poveda, C., Picado, L. Estudio de  
956 caracterización del Corredor Seco Centroamericano. FAO, Tegucigalpa, Honduras, 2012.  
957 <https://bibliotecasemiarios.ufv.br/jspui/handle/123456789/367>
- 958 Zhu, Y., Toth, Z., Wobus, R., Richardson, D., Mylne, K. Economic value of ensemble-based  
959 weather forecasts, *Bull. Am. Meteorol. Soc.*, 83, 73–83, [https://doi.org/10.1175/1520-0477\(2002\)083<0073:TEVOEB>2.3.CO;2](https://doi.org/10.1175/1520-0477(2002)083<0073:TEVOEB>2.3.CO;2), 2002.
